# Supplementary material
Source: publisher figshare collection journal article supplement (https://frontiersin.figshare.com/ndownloader/files/25765556)
Supplement: Supplementary file [file 25765556]

## Supplementary Material

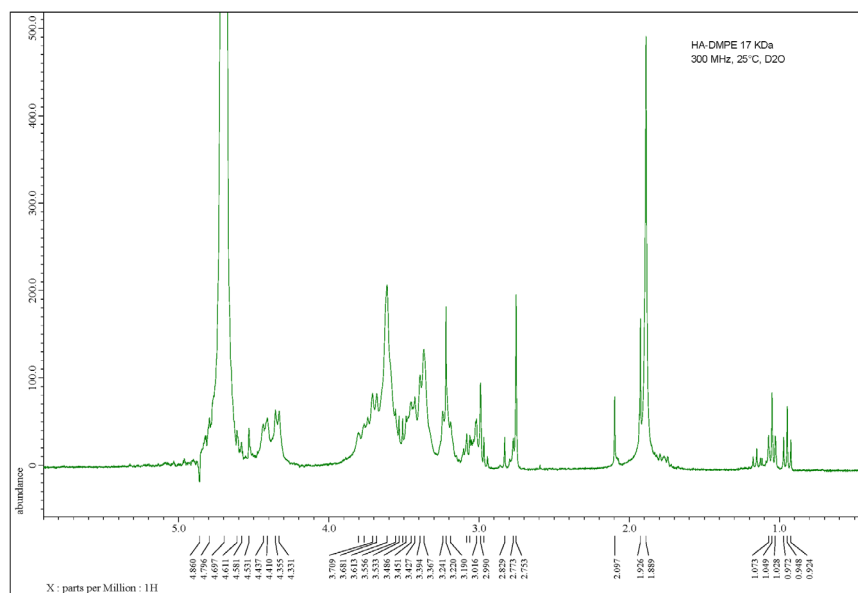

**Supplementary Figure 1.** Representative <sup>1</sup>H-NMR spectra of HA<sub>17</sub>-DMPE measured in D<sub>2</sub>O.

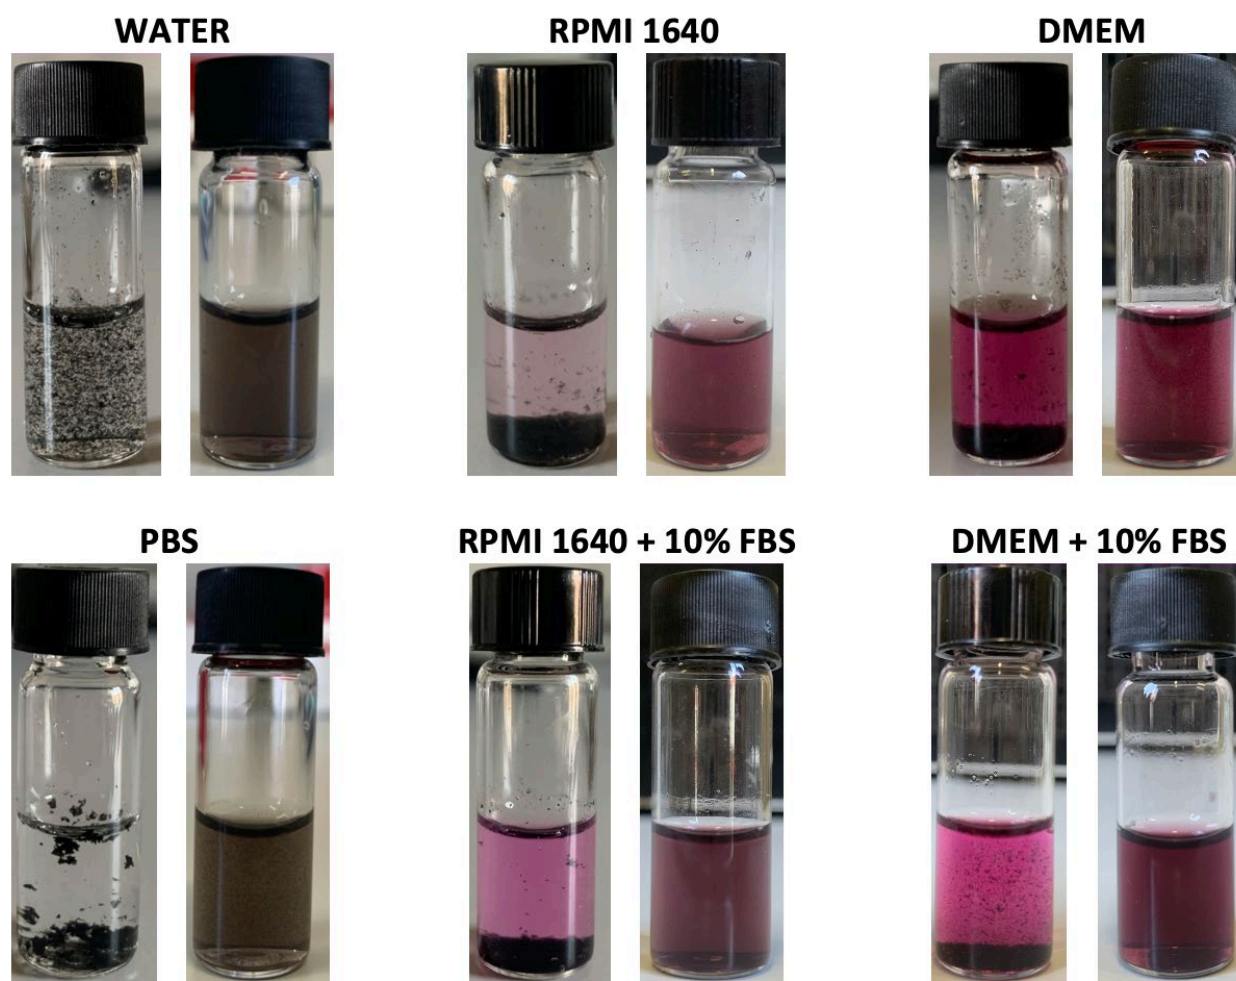

**Supplementary Figure 2.** Representative images of DOX/CNT (left) and DOX/CNT/HA<sub>200</sub>-DMPE (right) dispersion stability after 25 days at 4°C in various biological fluids at a concentration of 50 µg/mL.
